# Supplementary material for: Correlates of protection for booster doses of the SARS-CoV-2 vaccine BNT162b2
Source: PubMed Central journal article supplement (PMC10387073; doi:10.1038/s41467-023-39816-4), 2023-07-29
Supplement: 41467_2023_39816_MOESM3_ESM.pdf [file 41467_2023_39816_MOESM3_ESM.pdf]

## Description of Additional Supplementary Files

**Supplementary Data 1:** Experimental data including antigen microarray, ELISA and neutralization assays measurements as well as infection and vaccination information for each individual.

**Supplementary Data 2:** Control cohort (Supplementary Fig. 1) antigen microarray area under the curve results and information about SARS-CoV-2 status.

**Supplementary Data 3:** The subset of 74 individuals in the immunogenicity subsets that were selected at baseline and belong to the low-baseline (n=38) and high-baseline (n=36) immune history quartiles.

**Supplementary Data 4:** Demographics, vaccination status and infection status of the 74 individuals in the immunogenicity subset used in the study, which included 38 low-baseline and 36 high-baseline individuals. P-values were computed using a t-test was used to compare the continuous variables and chi-square test was used for categorical variables.

**Supplementary Data 5:** list of antigens spotted on the SARS-CoV-2 antigen microarrays.

**Supplementary Data 6:** Hazard ratios and p-values of a Cox proportional hazard model for different baseline makers computed for individuals that received three doses of the Pfizer vaccine. P-values were computed using a two-sided Cox proportional hazard model comparing infection hazard at 60-90 follow up days in the low-baseline with high-baseline response groups using all markers. We used calendar days as the time-axis and adjusted for age, occupation, medical center, and time from the third vaccination. Results are presented in a decreasing order based on HR value and significant p-values are colored in bold.

**Supplementary Data 7:** Hazard ratios and p-values of a Cox proportional hazard model for different baseline makers computed for individuals that received four doses of the Pfizer vaccine. P-values were computed using a two-sided Cox proportional hazard model comparing infection hazard at 60-90 follow up days in the low-baseline with high-baseline response groups using all markers. We used calendar days as the time-axis and adjusted for age, occupation, medical center, and time from the third vaccination. Results are presented in a decreasing order based on HR value and significant p-values are colored in bold.

**Supplementary Data 8:** Baseline immune history groupings of the validation cohort using different baseline markers.
